# Supplementary material for: Embedded 3D printing of RGO frameworks with mechanical strength, and electrical and electromagnetic interference shielding properties
Source: Royal Society of Chemistry journal article supplement (doi:10.1039/d4ta00458b), 2024-01-01
Supplement: d4ta00458b1.pdf [file d4ta00458b1.pdf]

## Supplementary Information

### **Embedded 3D Printing of RGO Frameworks with Mechanical Strength, Electrical and Electromagnetic Interference Shielding Properties**

Yue Wang<sup>a</sup>, Jialiang Luo<sup>b</sup>, Cao Yang<sup>a</sup>, Lei Xiao<sup>a</sup>, Gazi Hao<sup>a</sup>, Suwei Wang<sup>\*,a</sup>, Wei Jiang<sup>\*,a</sup>

*<sup>a</sup>National Special Superfine Powder Engineering Research Center, Nanjing University of Science and Technology, Nanjing 210094, China*

*<sup>b</sup>Anhui Province Key Laboratory of Condensed Matter Physics at Extreme Conditions, High Magnetic Field Laboratory, HFIPS, Anhui, Chinese Academy of Sciences, Hefei 230031, China*

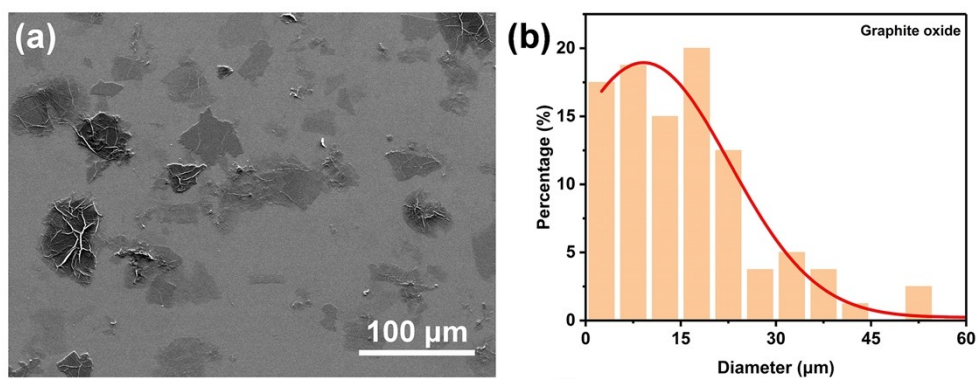

**Fig. S1** SEM image (a) and size distribution (b) of graphite oxide sheets.

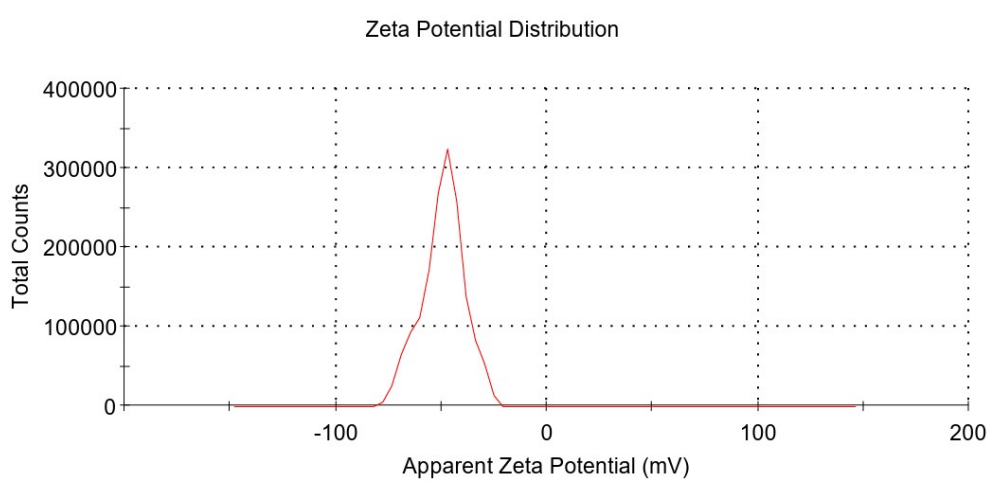

**Fig. S2** Zeta potential analysis of graphite oxide dispersion.

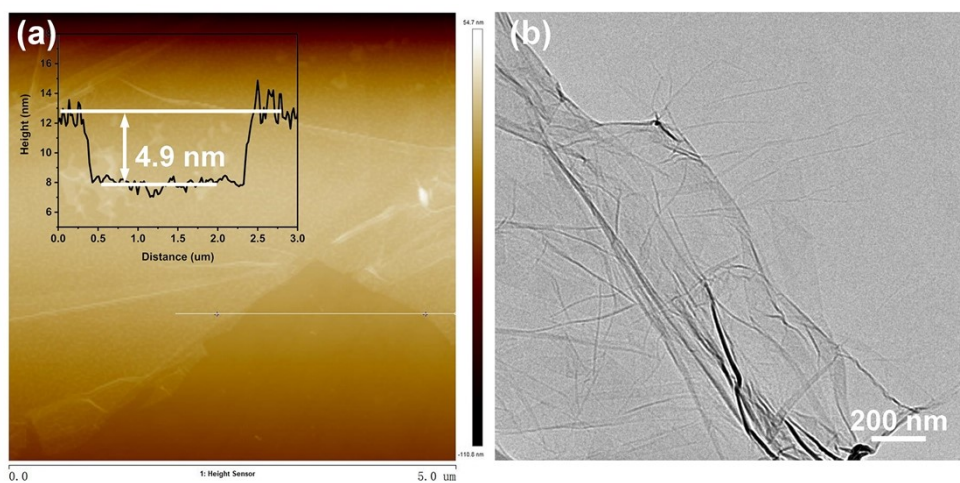

**Fig. S3** AFM image (a) and HRTEM image (b) of the GO sheet.

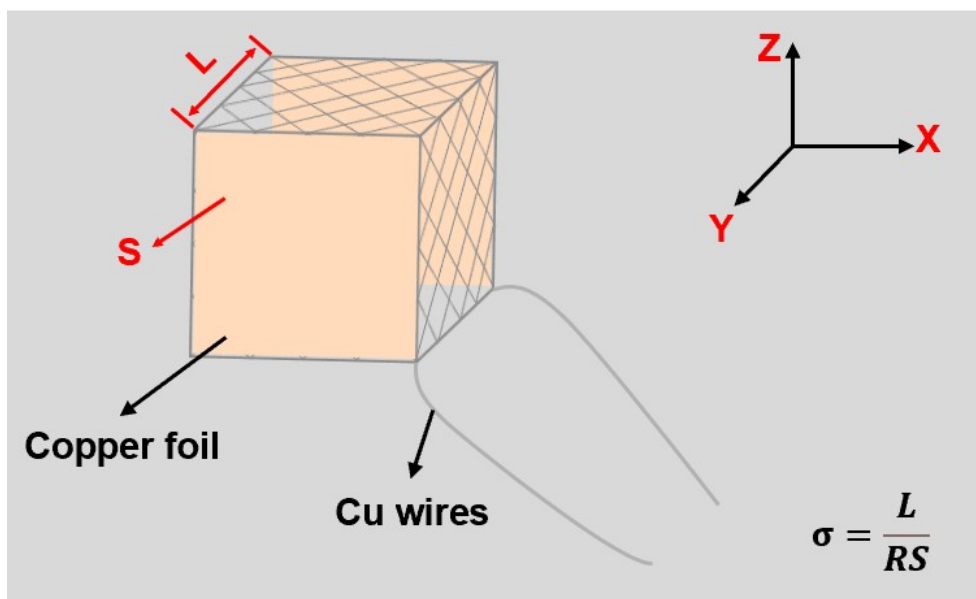

Fig. S4 Schematic diagram for testing resistance.

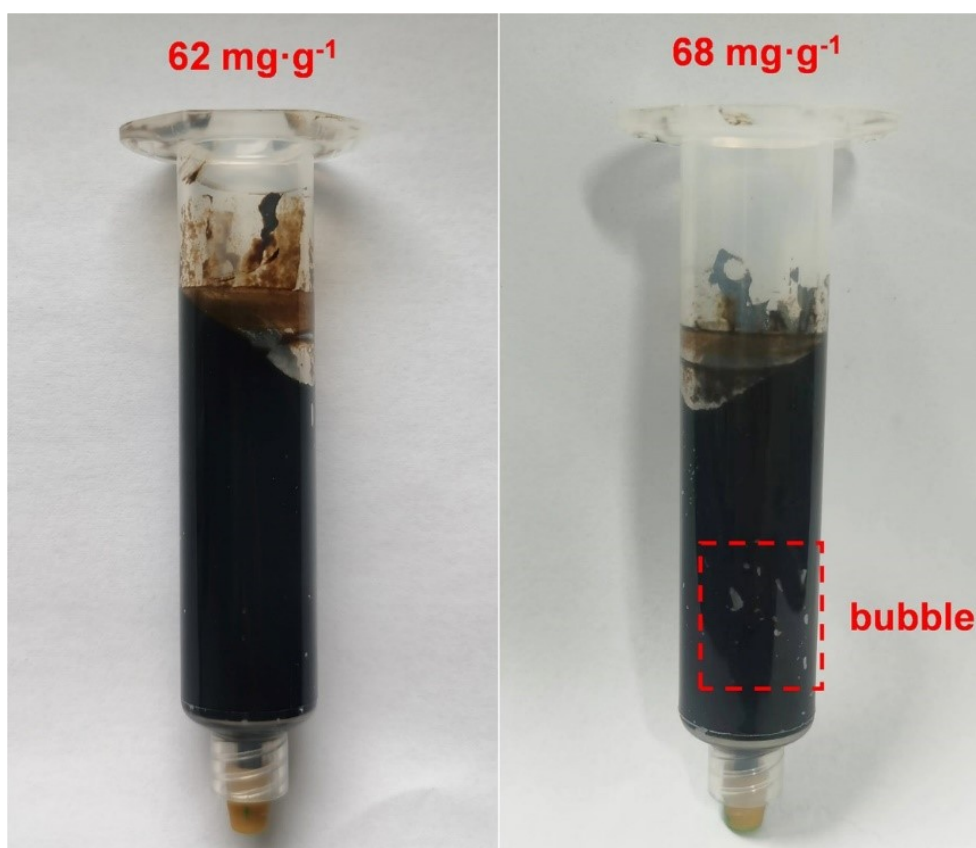

Fig. S5 Optical images of GO inks after defoaming.

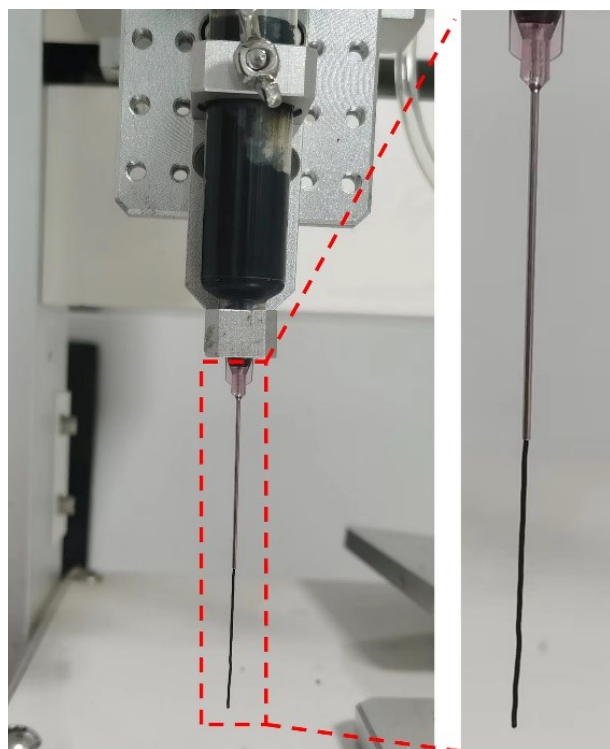

**Fig. S6** Optical images of an extruded  $62 \text{ mg}\cdot\text{g}^{-1}$  GO filament.

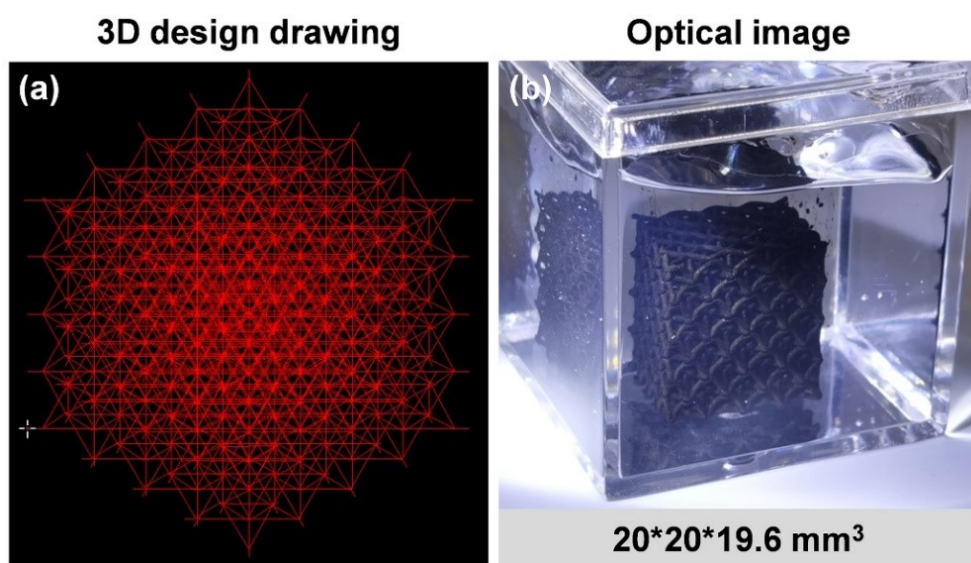

**Fig. S7** 3D design drawing (a) and optical image (b) of the printed framework.

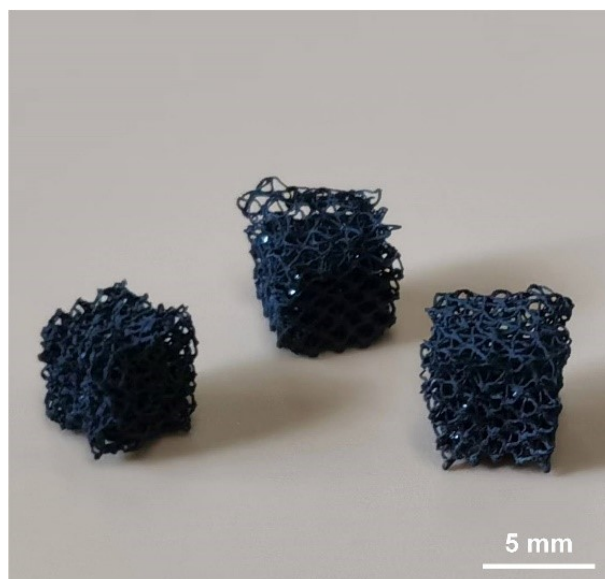

**Fig. S8** The deformed C-RGFs are obtained by capillary self-assembly drying without hydrothermal treatment.

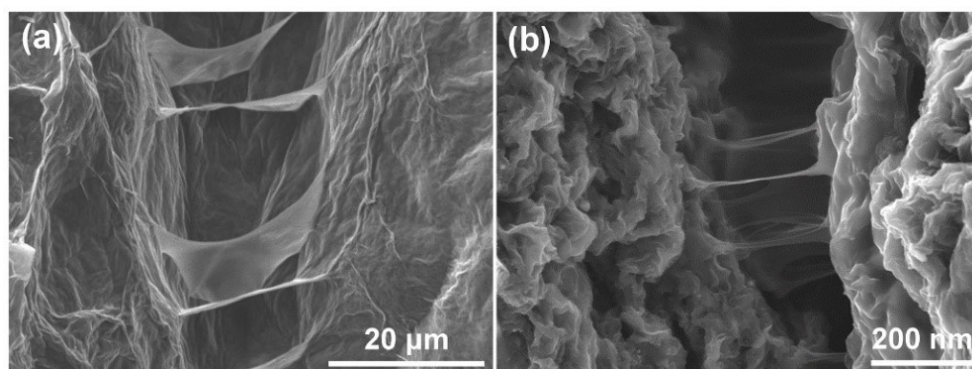

**Fig. S9** SEM images of the cross-linking of graphene struts in F-RGF (a) and C-RGF (b).

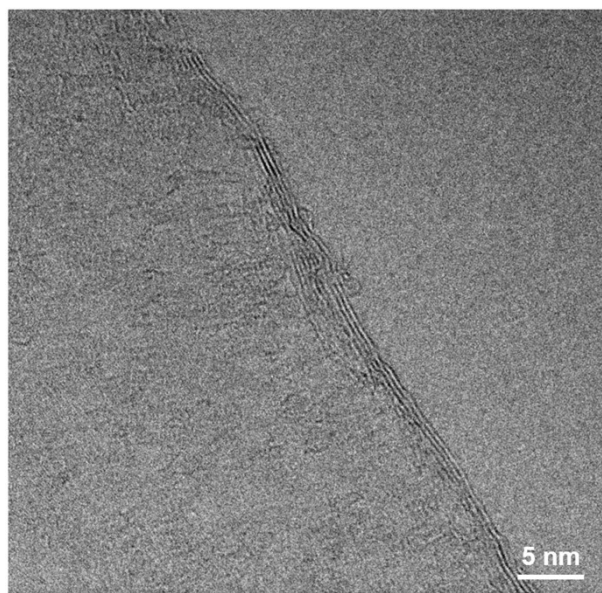

**Fig. S10** HRTEM image of the graphene sheet.

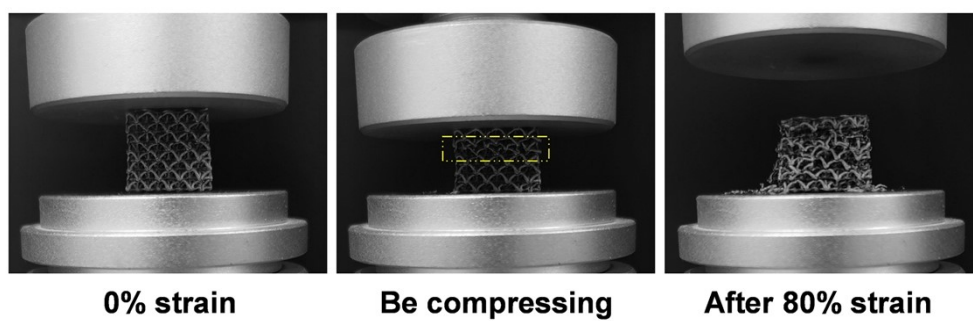

**Fig. S11** Optical images of F-RGF during compression.

**Table S1** Comparison of maximum compressive stress ( $\sigma$ ) and related strain ( $\epsilon$ ) at maximum stress of 3D graphene assemblies.

| <b>Samples</b>   | <b><math>\rho</math><br/>(mg cm<sup>-3</sup>)</b> | <b><math>\epsilon</math><br/>(%)</b> | <b><math>\sigma</math><br/>(kPa)</b> | <b>Ref.</b> |
|------------------|---------------------------------------------------|--------------------------------------|--------------------------------------|-------------|
| Graphene aerogel | 15                                                | 50                                   | 73.9                                 | 1           |
| Graphene aerogel | 8.49                                              | 50                                   | 17.2                                 | 2           |
| Graphene aerogel | 14.9                                              | 50                                   | 10.4                                 | 3           |
| Graphene aerogel | 9.3                                               | 50                                   | 8.8                                  | 4           |
| Graphene aerogel | 17.3                                              | 50                                   | 4                                    | 5           |
| F-PGF            | 14.89                                             | 50                                   | 35.42                                | This work   |
| C-DGF            | 447.10                                            | 9                                    | 3230                                 | This work   |

Note:  $\rho$  is the density of the sample.

**Table S2** A comparative analysis of the EMI shielding properties of graphene-based materials.

| Materials         | Structure   | t<br>(mm) | SE <sub>A</sub><br>(dB) | SE <sub>R</sub><br>(dB) | SE <sub>T</sub><br>(dB) | SE <sub>A</sub> /t<br>(dB mm <sup>-1</sup> ) | SE <sub>T</sub> /t<br>(dB mm <sup>-1</sup> ) | Ref.      |
|-------------------|-------------|-----------|-------------------------|-------------------------|-------------------------|----------------------------------------------|----------------------------------------------|-----------|
| Graphene/CNTs     | Foam        | 2.4       | 47.92                   | 6.51                    | 54.43                   | 19.97                                        | 22.68                                        | 6         |
| Graphite/PDMS     | Foam        | 4.5       | 32.00                   | 3.50                    | 35.50                   | 7.11                                         | 7.89                                         | 7         |
| Graphene/PDMS     | Foam        | 1.0       | 12.50                   | 2.50                    | 15.00                   | 12.50                                        | 15.00                                        | 8         |
| GNPs/rGO/EP       | Foam        | 3.0       | 42.30                   | 8.70                    | 51.00                   | 14.10                                        | 17.00                                        | 9         |
| Graphene/paraffin | Aerogel     | 2.5       | 38.12                   | 5.17                    | 43.29                   | 15.24                                        | 17.32                                        | 10        |
| Carbon/graphene   | Aerogel     | 2.0       | 52.80                   | 1.80                    | 54.60                   | 26.40                                        | 27.30                                        | 11        |
| Graphene/PI       | Aerogel     | 2.5       | -                       | -                       | 27.50                   | -                                            | 11.00                                        | 12        |
| Graphene          | Aerogel     | 2.5       | 35.40                   | 4.80                    | 40.20                   | 14.16                                        | 16.08                                        | 13        |
| Graphene/MXene    | Aerogel     | 3.0       | 25.00                   | 2.00                    | 27.00                   | 8.333                                        | 9.00                                         | 14        |
| Graphene          | 3D scaffold | 3.0       | 61.10                   | 6.03                    | 67.13                   | 20.37                                        | 22.38                                        | 15        |
| Graphene/PLA      | 3D scaffold | 2.0       | 27.80                   | 7.10                    | 34.90                   | 13.90                                        | 17.45                                        | 16        |
| Graphene/MXene    | 3D scaffold | 2.2       | 36.20                   | 4.22                    | 40.42                   | 16.45                                        | 18.37                                        | 17        |
| EGO/TOCNF         | 3D scaffold | 2.5       | 49.80                   | 5.80                    | 55.60                   | 19.92                                        | 22.24                                        | 18        |
| C-RGF/PDMS        | 3D scaffold | 1.6       | 36.10                   | 8.14                    | 44.23                   | 22.56                                        | 27.64                                        | This work |
| F-RGF/PDMS        | 3D scaffold | 1.6       | 37.46                   | 3.43                    | 40.88                   | 23.41                                        | 25.56                                        | This work |
| C-RGF/PDMS        | 3D scaffold | 2.2       | 48.75                   | 7.00                    | 55.75                   | 22.16                                        | 25.34                                        | This work |
| F-RGF/PDMS        | 3D scaffold | 2.2       | 53.44                   | 3.53                    | 56.97                   | 24.29                                        | 25.90                                        | This work |
| C-RGF/PDMS        | 3D scaffold | 2.8       | 49.30                   | 6.44                    | 55.74                   | 17.60                                        | 19.91                                        | This work |
| F-RGF/PDMS        | 3D scaffold | 2.8       | 64.02                   | 3.48                    | 67.50                   | 22.86                                        | 24.11                                        | This work |



## References

- 1 J. Afroze, L. Tong, M. Abden, Z. Yuan and Y. Chen, *Carbon*, 2021, **175**, 312-321.
- 2 R. Luo, Z. Li, X. Wu, H. Liu, L. Ma, J. Wu, G. Qin, J. Wang and S. Yang, *Carbon*, 2022, **191**, 153-163.
- 3 S. Wang, Y. Xu, Y. Ma, X. Sun, Y. Gong and Y. Li, *Compos. Sci. Technol.*, 2023, **243**, 110250.
- 4 K. Hu, T. Szkopek and M. Cerruti, *J. Mater. Chem. A*, 2017, **5**, 23123-23130.
- 5 Y. Zhang, L. Zhang, G. Zhang and H. Li, *ACS Appl. Mater. Interfaces*, 2018, **10**, 21565-21572.
- 6 H. Jia, Q. Kong, Z. Liu, X. Wei, X. Li, J. Chen, F. Li, X. Yang, G. Sun and C. Chen, *Compos. Part A: Appl. S.*, 2020, **129**, 105712.
- 7 H. Li, L. Jing, Z. Ngoh, R. Tay, J. Lin, H. Wang, S. Tsang and E. Teo, *ACS Appl. Mater. Interfaces*, 2018, **10**, 41707-41716.
- 8 V. Nguyen, B. Min, Y. Yi, S. Kim and C. Choi, *Chem. Eng. J.*, 2020, **393**, 124608.
- 9 C. Liang, H. Qiu, Y. Han, H. Gu, P. Song, L. Wang, J. Kong, D. Cao and J. Gu, *J. Mater. Chem. C*, 2019, **7**, 2725-2733.
- 10 C. Li, Y. Li, Q. Zhao, Y. Luo, G. Yang, Y. Hu and J. Jiang, *ACS Appl. Mater. Interfaces*, 2020, **12**, 30686-30694.
- 11 X. Jiang, Z. Zhao, S. Zhou, H. Zou and P. Liu, *ACS Appl. Mater. Interfaces*, 2022, **14**, 45844-45852.
- 12 Z. Yu, T. Dai, S. Yuan, H. Zou and P. Liu, *ACS Appl. Mater. Interfaces*, 2020, **12**, 30990-31001.

- 13 S. Bi, L. Zhang, C. Mu, H. Lee, J. Cheah, E. Chua, K. See, M. Liu and X. Hu, *J. Colloid Interface Sci.*, 2017, **492**, 112-118.
- 14 X. Zheng, J. Tang, P. Wang, Z. Wang, L. Zou and C. Li, *J. Colloid Interface Sci.*, 2022, **628**, 994-1003.
- 15 H. Guo, T. Hua, J. Qin, Q. Wu, R. Wang, B. Qian, L. Li and X. Shi, *Adv. Mater. Technol.*, 2022, **7**, 2101699.
- 16 S. Shi, M. Dai, X. Tao, F. Wu, J. Sun and Y. Chen, *Chem. Eng. J.*, 2022, **450**, 138248.
- 17 X. Pei, G. Liu, H. Shi, R. Yu, S. Wang, S. Liu, C. Min, J. Song, R. Shao and Z. Xu, *Compos. Sci. Technol.*, 2023, **233**, 109909.
- 18 E. Erfanian, R. Moaref, R. Ajdary, K. Tam, O. Rojas, M. Kamkar and U. Sundararaj, *Carbon*, 2023, **210**, 118037.
